# Supplementary material for: Natural Protein Intake in Children with Phenylketonuria: Prescription vs. Actual Intakes
Source: MDPI journal article supplement (doi:10.3390/nu15234903), 2023-11-23
Supplement: s1 [file s1]

**Supplementary Table S1. Natural protein and phenylalanine of all patients during the study – intake and prescribed.**

| <b>Subject number<br/>(Month)<br/>(Day)</b> | <b>Prescribed natural protein intake (g)</b> | <b>Actual total Natural protein intake (g)</b> | <b>Difference between natural protein prescription vs. intake (g)</b> | <b>Prescribed phenylalanine (mg)</b> | <b>Actual total Phenylalanine intake (mg)</b> | <b>Difference between phenylalanine prescription vs. intake (mg)</b> | <b>% increase of Natural protein intake vs prescribed</b> |
|---------------------------------------------|----------------------------------------------|------------------------------------------------|-----------------------------------------------------------------------|--------------------------------------|-----------------------------------------------|----------------------------------------------------------------------|-----------------------------------------------------------|
| <b>1<br/>(Month 1)<br/>(Day 1)</b>          | 5                                            | 8                                              | 3                                                                     | 250                                  | 400                                           | 150                                                                  | 38                                                        |
| <b>1<br/>(Month 1)<br/>(Day 2)</b>          | 5                                            | 8                                              | 3                                                                     | 250                                  | 400                                           | 150                                                                  | 38                                                        |
| <b>1<br/>(Month 1)<br/>(Day 3)</b>          | 5                                            | 10                                             | 5                                                                     | 250                                  | 500                                           | 250                                                                  | 50                                                        |
| <b>1<br/>(Month 2)<br/>(Day 1)</b>          | 5                                            | 9                                              | 4                                                                     | 250                                  | 450                                           | 200                                                                  | 44                                                        |
| <b>1<br/>(Month 2)<br/>(Day 2)</b>          | 5                                            | 10                                             | 5                                                                     | 250                                  | 500                                           | 250                                                                  | 50                                                        |
| <b>1<br/>(Month 2)<br/>(Day 3)</b>          | 5                                            | 11                                             | 6                                                                     | 250                                  | 550                                           | 300                                                                  | 55                                                        |
| <b>1<br/>(Month 3)<br/>(Day 1)</b>          | 5                                            | 12                                             | 7                                                                     | 250                                  | 600                                           | 350                                                                  | 58                                                        |
| <b>1<br/>(Month 3)<br/>(Day 2)</b>          | 5                                            | 10                                             | 5                                                                     | 250                                  | 500                                           | 250                                                                  | 50                                                        |
| <b>1<br/>(Month 3)<br/>(Day 3)</b>          | 5                                            | 11                                             | 6                                                                     | 250                                  | 550                                           | 300                                                                  | 55                                                        |
| <b>1<br/>(Month 4)<br/>(Day 1)</b>          | 5                                            | 10                                             | 5                                                                     | 250                                  | 500                                           | 250                                                                  | 50                                                        |
| <b>1<br/>(Month 4)<br/>(Day 2)</b>          | 5                                            | 8                                              | 3                                                                     | 250                                  | 400                                           | 150                                                                  | 38                                                        |
| <b>1<br/>(Month 4)<br/>(Day 3)</b>          | 5                                            | 11                                             | 6                                                                     | 250                                  | 550                                           | 300                                                                  | 55                                                        |
| <b>1<br/>(Month 5)<br/>(Day 1)</b>          | 5                                            | 12                                             | 7                                                                     | 250                                  | 600                                           | 350                                                                  | 58                                                        |
| <b>1<br/>(Month 5)</b>                      | 5                                            | 10                                             | 5                                                                     | 250                                  | 500                                           | 250                                                                  | 50                                                        |

|                           |     |    |     |     |     |     |    |
|---------------------------|-----|----|-----|-----|-----|-----|----|
| (Day 2)                   |     |    |     |     |     |     |    |
| 1<br>(Month 5)<br>(Day 3) | 5   | 10 | 5   | 250 | 500 | 250 | 50 |
| 1<br>(Month 6)<br>(Day 1) | 5   | 8  | 3   | 250 | 400 | 150 | 38 |
| 1<br>(Month 6)<br>(Day 2) | 5   | 9  | 4   | 250 | 450 | 200 | 44 |
| 1<br>(Month 6)<br>(Day 3) | 5   | 8  | 3   | 250 | 450 | 200 | 38 |
| 2<br>(Month 1)<br>(Day 1) | 6,5 | 10 | 3,5 | 325 | 500 | 175 | 35 |
| 2<br>(Month 1)<br>(Day 2) | 6,5 | 12 | 5,5 | 325 | 600 | 275 | 46 |
| 2<br>(Month 1)<br>(Day 3) | 6,5 | 9  | 2,5 | 325 | 450 | 125 | 28 |
| 2<br>(Month 2)<br>(Day 1) | 6,5 | 9  | 2,5 | 325 | 450 | 125 | 28 |
| 2<br>(Month 2)<br>(Day 2) | 6,5 | 9  | 2,5 | 325 | 450 | 125 | 28 |
| 2<br>(Month 2)<br>(Day 3) | 6,5 | 12 | 5,5 | 325 | 450 | 125 | 46 |
| 2<br>(Month 3)<br>(Day 1) | 6,5 | 10 | 3,5 | 325 | 500 | 175 | 35 |
| 2<br>(Month 3)<br>(Day 2) | 6,5 | 10 | 3,5 | 325 | 500 | 175 | 35 |
| 2<br>(Month 3)<br>(Day 3) | 6,5 | 9  | 2,5 | 325 | 450 | 125 | 28 |
| 2<br>(Month 4)<br>(Day 1) | 6,5 | 10 | 3,5 | 325 | 500 | 175 | 35 |
| 2<br>(Month 4)<br>(Day 2) | 6,5 | 9  | 2,5 | 325 | 450 | 125 | 28 |
| 2<br>(Month 4)<br>(Day 3) | 6,5 | 10 | 3,5 | 325 | 500 | 175 | 35 |
| 2<br>(Month 5)<br>(Day 1) | 6,5 | 9  | 2,5 | 325 | 450 | 125 | 28 |

|                           |     |    |     |      |      |     |    |
|---------------------------|-----|----|-----|------|------|-----|----|
| 2<br>(Month 5)<br>(Day 2) | 6,5 | 10 | 3,5 | 325  | 500  | 175 | 35 |
| 2<br>(Month 5)<br>(Day 3) | 6,5 | 13 | 6,5 | 325  | 650  | 325 | 50 |
| 2<br>(Month 6)<br>(Day 1) | 6,5 | 9  | 2,5 | 325  | 450  | 125 | 28 |
| 2<br>(Month 6)<br>(Day 2) | 6,5 | 10 | 3,5 | 325  | 500  | 175 | 35 |
| 2<br>(Month 6)<br>(Day 3) | 6,5 | 9  | 2,5 | 325  | 450  | 125 | 28 |
| 3<br>(Month 1)<br>(Day 1) | 27  | 30 | 3   | 1350 | 1500 | 150 | 10 |
| 3<br>(Month 1)<br>(Day 2) | 27  | 30 | 3   | 1350 | 1500 | 150 | 10 |
| 3<br>(Month 1)<br>(Day 3) | 27  | 31 | 4   | 1350 | 1550 | 200 | 13 |
| 3<br>(Month 2)<br>(Day 1) | 27  | 35 | 8   | 1350 | 1750 | 400 | 23 |
| 3<br>(Month 2)<br>(Day 2) | 27  | 32 | 5   | 1350 | 1600 | 250 | 16 |
| 3<br>(Month 2)<br>(Day 3) | 27  | 31 | 4   | 1350 | 1550 | 200 | 13 |
| 3<br>(Month 3)<br>(Day 1) | 27  | 33 | 6   | 1350 | 1650 | 300 | 18 |
| 3<br>(Month 3)<br>(Day 2) | 27  | 33 | 6   | 1350 | 1650 | 300 | 18 |
| 3<br>(Month 3)<br>(Day 3) | 27  | 32 | 5   | 1350 | 1600 | 250 | 16 |
| 3<br>(Month 4)<br>(Day 1) | 27  | 30 | 3   | 1350 | 1500 | 150 | 10 |
| 3<br>(Month 4)<br>(Day 2) | 27  | 34 | 7   | 1350 | 1700 | 350 | 21 |
| 3<br>(Month 4)<br>(Day 3) | 27  | 30 | 3   | 1350 | 1500 | 150 | 10 |
| 3                         | 27  | 30 | 3   | 1350 | 1500 | 150 | 10 |

|                           |    |    |    |      |      |     |    |
|---------------------------|----|----|----|------|------|-----|----|
| (Month 5)<br>(Day 1)      |    |    |    |      |      |     |    |
| 3<br>(Month 5)<br>(Day 2) | 27 | 30 | 3  | 1350 | 1500 | 150 | 10 |
| 3<br>(Month 5)<br>(Day 3) | 27 | 31 | 4  | 1350 | 1550 | 200 | 13 |
| 3<br>(Month 6)<br>(Day 1) | 27 | 36 | 9  | 1350 | 1800 | 450 | 25 |
| 3<br>(Month 6)<br>(Day 2) | 27 | 37 | 10 | 1350 | 1850 | 500 | 27 |
| 3<br>(Month 6)<br>(Day 3) | 27 | 36 | 9  | 1350 | 1800 | 450 | 25 |
| 4<br>(Month 1)<br>(Day 1) | 14 | 17 | 3  | 700  | 850  | 150 | 18 |
| 4<br>(Month 1)<br>(Day 2) | 14 | 16 | 2  | 700  | 800  | 100 | 13 |
| 4<br>(Month 1)<br>(Day 3) | 14 | 23 | 9  | 700  | 1150 | 450 | 39 |
| 4<br>(Month 2)<br>(Day 1) | 14 | 17 | 3  | 700  | 850  | 150 | 18 |
| 4<br>(Month 2)<br>(Day 2) | 14 | 17 | 3  | 700  | 850  | 150 | 18 |
| 4<br>(Month 2)<br>(Day 3) | 14 | 19 | 5  | 700  | 950  | 250 | 26 |
| 4<br>(Month 3)<br>(Day 1) | 14 | 17 | 3  | 700  | 850  | 150 | 18 |
| 4<br>(Month 3)<br>(Day 2) | 14 | 19 | 5  | 700  | 950  | 250 | 26 |
| 4<br>(Month 3)<br>(Day 3) | 14 | 19 | 5  | 700  | 950  | 250 | 26 |
| 4<br>(Month 4)<br>(Day 1) | 14 | 16 | 2  | 700  | 800  | 100 | 13 |
| 4<br>(Month 4)<br>(Day 2) | 14 | 16 | 2  | 700  | 650  | -50 | 13 |
| 4<br>(Month 4)            | 14 | 13 | -1 | 700  | 850  | 150 | -8 |

|                           |    |    |    |     |     |     |     |
|---------------------------|----|----|----|-----|-----|-----|-----|
| (Day 3)                   |    |    |    |     |     |     |     |
| 4<br>(Month 5)<br>(Day 1) | 14 | 17 | 3  | 700 | 850 | 150 | 18  |
| 4<br>(Month 5)<br>(Day 2) | 14 | 17 | 3  | 700 | 900 | 200 | 18  |
| 4<br>(Month 5)<br>(Day 3) | 14 | 19 | 5  | 700 | 850 | 150 | 26  |
| 4<br>(Month 6)<br>(Day 1) | 14 | 17 | 3  | 700 | 900 | 200 | 18  |
| 4<br>(Month 6)<br>(Day 2) | 14 | 19 | 5  | 700 | 850 | 150 | 26  |
| 4<br>(Month 6)<br>(Day 3) | 14 | 19 | 5  | 700 | 850 | 150 | 26  |
| 5<br>(Month 1)<br>(Day 1) | 6  | 7  | 1  | 300 | 350 | 50  | 14  |
| 5<br>(Month 1)<br>(Day 2) | 6  | 10 | 4  | 300 | 500 | 200 | 40  |
| 5<br>(Month 1)<br>(Day 3) | 6  | 8  | 2  | 300 | 400 | 100 | 25  |
| 5<br>(Month 2)<br>(Day 1) | 6  | 9  | 3  | 300 | 250 | -50 | 33  |
| 5<br>(Month 2)<br>(Day 2) | 6  | 5  | -1 | 300 | 450 | 150 | -20 |
| 5<br>(Month 2)<br>(Day 3) | 6  | 9  | 3  | 300 | 450 | 150 | 33  |
| 5<br>(Month 3)<br>(Day 1) | 6  | 10 | 4  | 300 | 350 | 50  | 40  |
| 5<br>(Month 3)<br>(Day 2) | 6  | 9  | 3  | 300 | 450 | 150 | 33  |
| 5<br>(Month 3)<br>(Day 3) | 6  | 7  | 1  | 300 | 350 | 50  | 14  |
| 5<br>(Month 4)<br>(Day 1) | 6  | 7  | 1  | 300 | 350 | 50  | 14  |
| 5<br>(Month 4)<br>(Day 2) | 6  | 9  | 3  | 300 | 450 | 150 | 33  |

|                           |     |    |      |     |     |      |     |
|---------------------------|-----|----|------|-----|-----|------|-----|
| 5<br>(Month 4)<br>(Day 3) | 6   | 7  | 1    | 300 | 350 | 50   | 14  |
| 5<br>(Month 5)<br>(Day 1) | 6   | 11 | 5    | 300 | 550 | 250  | 45  |
| 5<br>(Month 5)<br>(Day 2) | 6   | 9  | 3    | 300 | 450 | 150  | 33  |
| 5<br>(Month 5)<br>(Day 3) | 6   | 7  | 1    | 300 | 450 | 150  | 14  |
| 5<br>(Month 6)<br>(Day 1) | 6   | 9  | 3    | 300 | 450 | 150  | 33  |
| 5<br>(Month 6)<br>(Day 2) | 6   | 12 | 6    | 300 | 600 | 300  | 50  |
| 5<br>(Month 6)<br>(Day 3) | 6   | 10 | 4    | 300 | 500 | 200  | 40  |
| 6<br>(Month 1)<br>(Day 1) | 7,5 | 5  | -2,5 | 375 | 250 | -125 | -50 |
| 6<br>(Month 1)<br>(Day 2) | 7,5 | 9  | 1,5  | 375 | 450 | 75   | 17  |
| 6<br>(Month 1)<br>(Day 3) | 7,5 | 12 | 4,5  | 375 | 600 | 225  | 38  |
| 6<br>(Month 2)<br>(Day 1) | 7,5 | 7  | -0,5 | 375 | 350 | -25  | -7  |
| 6<br>(Month 2)<br>(Day 2) | 7,5 | 11 | 3,5  | 375 | 550 | 175  | 32  |
| 6<br>(Month 2)<br>(Day 3) | 7,5 | 12 | 4,5  | 375 | 600 | 225  | 38  |
| 6<br>(Month 3)<br>(Day 1) | 7,5 | 5  | -2,5 | 375 | 250 | -125 | -50 |
| 6<br>(Month 3)<br>(Day 2) | 7,5 | 9  | 1,5  | 375 | 450 | 75   | 17  |
| 6<br>(Month 3)<br>(Day 3) | 7,5 | 12 | 4,5  | 375 | 600 | 225  | 38  |
| 6<br>(Month 4)<br>(Day 1) | 7,5 | 14 | 6,5  | 375 | 700 | 325  | 46  |
| 6                         | 7,5 | 11 | 3,5  | 375 | 550 | 175  | 32  |

|                           |     |    |      |     |     |     |    |
|---------------------------|-----|----|------|-----|-----|-----|----|
| 6<br>(Month 4)<br>(Day 2) |     |    |      |     |     |     |    |
| 6<br>(Month 4)<br>(Day 3) | 7,5 | 14 | 6,5  | 375 | 700 | 325 | 46 |
| 6<br>(Month 5)<br>(Day 1) | 7,5 | 7  | -0,5 | 375 | 350 | -25 | -7 |
| 6<br>(Month 5)<br>(Day 2) | 7,5 | 11 | 3,5  | 375 | 550 | 175 | 32 |
| 6<br>(Month 5)<br>(Day 3) | 7,5 | 12 | 4,5  | 375 | 600 | 225 | 38 |
| 6<br>(Month 6)<br>(Day 1) | 7,5 | 9  | 1,5  | 375 | 450 | 75  | 17 |
| 6<br>(Month 6)<br>(Day 2) | 7,5 | 9  | 1,5  | 375 | 450 | 75  | 17 |
| 6<br>(Month 6)<br>(Day 3) | 7,5 | 12 | 4,5  | 375 | 600 | 225 | 38 |
| 7<br>(Month 1)<br>(Day 1) | 4,5 | 9  | 4,5  | 225 | 250 | 25  | 50 |
| 7<br>(Month 1)<br>(Day 2) | 4,5 | 5  | 0,5  | 225 | 500 | 275 | 10 |
| 7<br>(Month 1)<br>(Day 3) | 4,5 | 10 | 5,5  | 225 | 450 | 225 | 55 |
| 7<br>(Month 2)<br>(Day 1) | 4,5 | 9  | 4,5  | 225 | 800 | 575 | 50 |
| 7<br>(Month 2)<br>(Day 2) | 4,5 | 16 | 11,5 | 225 | 500 | 275 | 72 |
| 7<br>(Month 2)<br>(Day 3) | 4,5 | 10 | 5,5  | 225 | 450 | 225 | 55 |
| 7<br>(Month 3)<br>(Day 1) | 4,5 | 9  | 4,5  | 225 | 250 | 25  | 50 |
| 7<br>(Month 3)<br>(Day 2) | 4,5 | 5  | 0,5  | 225 | 500 | 275 | 10 |
| 7<br>(Month 3)<br>(Day 3) | 4,5 | 10 | 5,5  | 225 | 300 | 75  | 55 |
| 7<br>(Month 4)            | 4,5 | 6  | 1,5  | 225 | 200 | -25 | 25 |

|                           |     |    |      |     |     |     |    |
|---------------------------|-----|----|------|-----|-----|-----|----|
| (Day 1)                   |     |    |      |     |     |     |    |
| 7<br>(Month 4)<br>(Day 2) | 4,5 | 8  | 3,5  | 225 | 400 | 175 | 44 |
| 7<br>(Month 4)<br>(Day 3) | 4,5 | 7  | 2,5  | 225 | 350 | 125 | 36 |
| 7<br>(Month 5)<br>(Day 1) | 4,5 | 9  | 4,5  | 225 | 450 | 225 | 50 |
| 7<br>(Month 5)<br>(Day 2) | 4,5 | 5  | 0,5  | 225 | 250 | 25  | 10 |
| 7<br>(Month 5)<br>(Day 3) | 4,5 | 10 | 5,5  | 225 | 500 | 275 | 55 |
| 7<br>(Month 6)<br>(Day 1) | 4,5 | 9  | 4,5  | 225 | 450 | 225 | 50 |
| 7<br>(Month 6)<br>(Day 2) | 4,5 | 16 | 11,5 | 225 | 800 | 575 | 72 |
| 7<br>(Month 6)<br>(Day 3) | 4,5 | 10 | 5,5  | 225 | 500 | 275 | 55 |
| 8<br>(Month 1)<br>(Day 1) | 3   | 11 | 8    | 150 | 550 | 400 | 73 |
| 8<br>(Month 1)<br>(Day 2) | 3   | 11 | 8    | 150 | 550 | 400 | 73 |
| 8<br>(Month 1)<br>(Day 3) | 3   | 10 | 7    | 150 | 500 | 350 | 70 |
| 8<br>(Month 2)<br>(Day 1) | 3   | 7  | 4    | 150 | 350 | 200 | 57 |
| 8<br>(Month 2)<br>(Day 2) | 3   | 9  | 6    | 150 | 450 | 300 | 67 |
| 8<br>(Month 2)<br>(Day 3) | 3   | 4  | 1    | 150 | 200 | 50  | 25 |
| 8<br>(Month 3)<br>(Day 1) | 3   | 5  | 2    | 150 | 250 | 100 | 40 |
| 8<br>(Month 3)<br>(Day 2) | 3   | 5  | 2    | 150 | 250 | 100 | 40 |
| 8<br>(Month 3)<br>(Day 3) | 3   | 7  | 4    | 150 | 350 | 200 | 57 |

|                           |   |    |   |     |     |     |    |
|---------------------------|---|----|---|-----|-----|-----|----|
| 8<br>(Month 4)<br>(Day 1) | 3 | 11 | 8 | 150 | 550 | 400 | 73 |
| 8<br>(Month 4)<br>(Day 3) | 3 | 11 | 8 | 150 | 550 | 400 | 73 |
| 8<br>(Month 4)<br>(Day 4) | 3 | 10 | 7 | 150 | 500 | 350 | 70 |
| 8<br>(Month 5)<br>(Day 1) | 3 | 8  | 5 | 150 | 400 | 250 | 63 |
| 8<br>(Month 5)<br>(Day 2) | 3 | 6  | 3 | 150 | 300 | 150 | 50 |
| 8<br>(Month 5)<br>(Day 3) | 3 | 4  | 1 | 150 | 200 | 50  | 25 |
| 8<br>(Month 6)<br>(Day 1) | 3 | 7  | 4 | 150 | 350 | 200 | 57 |
| 8<br>(Month 6)<br>(Day 2) | 3 | 9  | 6 | 150 | 450 | 300 | 67 |
| 8<br>(Month 6)<br>(Day 3) | 3 | 4  | 1 | 150 | 200 | 50  | 25 |
| 9<br>(Month 1)<br>(Day 1) | 5 | 8  | 3 | 250 | 400 | 150 | 38 |
| 9<br>(Month 1)<br>(Day 2) | 5 | 9  | 4 | 250 | 450 | 200 | 44 |
| 9<br>(Month 1)<br>(Day 3) | 5 | 10 | 5 | 250 | 500 | 250 | 50 |
| 9<br>(Month 2)<br>(Day 1) | 5 | 9  | 4 | 250 | 450 | 200 | 44 |
| 9<br>(Month 2)<br>(Day 2) | 5 | 10 | 5 | 250 | 500 | 250 | 50 |
| 9<br>(Month 2)<br>(Day 3) | 5 | 10 | 5 | 250 | 500 | 250 | 50 |
| 9<br>(Month 3)<br>(Day 1) | 5 | 12 | 7 | 250 | 600 | 350 | 58 |
| 9<br>(Month 3)<br>(Day 2) | 5 | 10 | 5 | 250 | 500 | 250 | 50 |
| 9                         | 5 | 10 | 5 | 250 | 500 | 250 | 50 |

|                            |   |    |   |     |     |     |    |
|----------------------------|---|----|---|-----|-----|-----|----|
| (Month 3)<br>(Day 3)       |   |    |   |     |     |     |    |
| 9<br>(Month 4)<br>(Day 1)  | 5 | 9  | 4 | 250 | 450 | 200 | 44 |
| 9<br>(Month 4)<br>(Day 2)  | 5 | 8  | 3 | 250 | 400 | 150 | 38 |
| 9<br>(Month 4)<br>(Day 3)  | 5 | 7  | 2 | 250 | 350 | 100 | 29 |
| 9<br>(Month 5)<br>(Day 1)  | 5 | 8  | 3 | 250 | 400 | 150 | 38 |
| 9<br>(Month 5)<br>(Day 2)  | 5 | 6  | 1 | 250 | 300 | 50  | 17 |
| 9<br>(Month 5)<br>(Day 3)  | 5 | 10 | 5 | 250 | 500 | 250 | 50 |
| 9<br>(Month 6)<br>(Day 1)  | 5 | 9  | 4 | 250 | 450 | 200 | 44 |
| 9<br>(Month 6)<br>(Day 2)  | 5 | 8  | 3 | 250 | 400 | 150 | 38 |
| 9<br>(Month 6)<br>(Day 3)  | 5 | 8  | 3 | 250 | 400 | 150 | 38 |
| 10<br>(Month 1)<br>(Day 1) | 4 | 6  | 2 | 200 | 300 | 100 | 33 |
| 10<br>(Month 1)<br>(Day 2) | 4 | 7  | 3 | 200 | 350 | 150 | 43 |
| 10<br>(Month 1)<br>(Day 3) | 4 | 8  | 4 | 200 | 400 | 200 | 50 |
| 10<br>(Month 2)<br>(Day 1) | 4 | 8  | 4 | 200 | 400 | 200 | 50 |
| 10<br>(Month 2)<br>(Day 2) | 4 | 7  | 3 | 200 | 350 | 150 | 43 |
| 10<br>(Month 2)<br>(Day 3) | 4 | 4  | 0 | 200 | 200 | 0   | 0  |
| 10<br>(Month 3)<br>(Day 1) | 4 | 13 | 9 | 200 | 650 | 450 | 69 |
| 10<br>(Month 3)            | 4 | 9  | 5 | 200 | 450 | 250 | 56 |

|                            |   |    |   |     |     |     |    |
|----------------------------|---|----|---|-----|-----|-----|----|
| (Day 2)                    |   |    |   |     |     |     |    |
| 10<br>(Month 3)<br>(Day 3) | 4 | 9  | 5 | 200 | 450 | 250 | 56 |
| 10<br>(Month 4)<br>(Day 1) | 4 | 4  | 0 | 200 | 200 | 0   | 0  |
| 10<br>(Month 4)<br>(Day 2) | 4 | 9  | 5 | 200 | 450 | 250 | 56 |
| 10<br>(Month 4)<br>(Day 3) | 4 | 8  | 4 | 200 | 400 | 200 | 50 |
| 10<br>(Month 5)<br>(Day 1) | 4 | 6  | 2 | 200 | 300 | 100 | 33 |
| 10<br>(Month 5)<br>(Day 2) | 4 | 8  | 4 | 200 | 400 | 200 | 50 |
| 10<br>(Month 5)<br>(Day 3) | 4 | 6  | 2 | 200 | 300 | 100 | 33 |
| 10<br>(Month 6)<br>(Day 1) | 4 | 5  | 1 | 200 | 250 | 50  | 20 |
| 10<br>(Month 6)<br>(Day 2) | 4 | 7  | 3 | 200 | 350 | 150 | 43 |
| 10<br>(Month 6)<br>(Day 3) | 4 | 6  | 2 | 200 | 300 | 100 | 33 |
| 11<br>(Month 1)<br>(Day 1) | 8 | 13 | 5 | 400 | 650 | 250 | 38 |
| 11<br>(Month 1)<br>(Day 2) | 8 | 10 | 2 | 400 | 500 | 100 | 20 |
| 11<br>(Month 2)<br>(Day 1) | 8 | 16 | 8 | 400 | 800 | 400 | 50 |
| 11<br>(Month 2)<br>(Day 2) | 8 | 12 | 4 | 400 | 600 | 200 | 33 |
| 11<br>(Month 3)<br>(Day 1) | 8 | 12 | 4 | 400 | 600 | 200 | 33 |
| 11<br>(Month 3)<br>(Day 2) | 8 | 14 | 6 | 400 | 700 | 300 | 43 |
| 11<br>(Month 4)<br>(Day 1) | 8 | 14 | 6 | 400 | 700 | 300 | 43 |

|                            |   |    |    |     |     |     |     |
|----------------------------|---|----|----|-----|-----|-----|-----|
| 11<br>(Month 4)<br>(Day 2) | 8 | 11 | 3  | 400 | 550 | 150 | 27  |
| 11<br>(Month 5)<br>(Day 1) | 8 | 12 | 4  | 400 | 600 | 200 | 33  |
| 11<br>(Month 5)<br>(Day 2) | 8 | 11 | 3  | 400 | 550 | 150 | 27  |
| 11<br>(Month 1)<br>(Day 1) | 8 | 7  | -1 | 400 | 350 | -50 | -14 |
| 11<br>(Month 6)<br>(Day 2) | 8 | 8  | 0  | 400 | 400 | 0   | 0   |
| 12<br>(Month 1)<br>(Day 1) | 4 | 10 | 6  | 200 | 500 | 300 | 60  |
| 12<br>(Month 1)<br>(Day 2) | 4 | 9  | 5  | 200 | 450 | 250 | 56  |
| 12<br>(Month 1)<br>(Day 3) | 4 | 13 | 9  | 200 | 650 | 450 | 69  |
| 12<br>(Month 2)<br>(Day 1) | 4 | 5  | 1  | 200 | 250 | 50  | 20  |
| 12<br>(Month 2)<br>(Day 2) | 4 | 7  | 3  | 200 | 350 | 150 | 43  |
| 12<br>(Month 2)<br>(Day 3) | 4 | 8  | 4  | 200 | 400 | 200 | 50  |
| 12<br>(Month 3)<br>(Day 1) | 4 | 5  | 1  | 200 | 250 | 50  | 20  |
| 12<br>(Month 3)<br>(Day 2) | 4 | 9  | 5  | 200 | 450 | 250 | 56  |
| 12<br>(Month 3)<br>(Day 3) | 4 | 9  | 5  | 200 | 450 | 250 | 56  |
| 12<br>(Month 4)<br>(Day 1) | 4 | 9  | 5  | 200 | 450 | 250 | 56  |
| 12<br>(Month 4)<br>(Day 2) | 4 | 5  | 1  | 200 | 250 | 50  | 20  |
| 12<br>(Month 4)<br>(Day 3) | 4 | 5  | 1  | 200 | 250 | 50  | 20  |
| 12                         | 4 | 4  | 0  | 200 | 200 | 0   | 0   |

|                            |   |    |   |     |     |     |    |
|----------------------------|---|----|---|-----|-----|-----|----|
| 12<br>(Month 5)<br>(Day 1) |   |    |   |     |     |     |    |
| 12<br>(Month 5)<br>(Day 2) | 4 | 8  | 4 | 200 | 400 | 200 | 50 |
| 12<br>(Month 5)<br>(Day 3) | 4 | 9  | 5 | 200 | 450 | 250 | 56 |
| 12<br>(Month 6)<br>(Day 1) | 4 | 12 | 8 | 200 | 600 | 400 | 67 |
| 12<br>(Month 6)<br>(Day 2) | 4 | 9  | 5 | 200 | 450 | 250 | 56 |
| 12<br>(Month 6)<br>(Day 3) | 4 | 9  | 5 | 200 | 450 | 250 | 56 |
| 13<br>(Month 1)<br>(Day 1) | 7 | 15 | 8 | 350 | 750 | 400 | 53 |
| 13<br>(Month 1)<br>(Day 2) | 7 | 10 | 3 | 350 | 500 | 150 | 30 |
| 13<br>(Month 2)<br>(Day 1) | 7 | 13 | 6 | 350 | 650 | 300 | 46 |
| 13<br>(Month 2)<br>(Day 2) | 7 | 9  | 2 | 350 | 450 | 100 | 22 |
| 13<br>(Month 3)<br>(Day 1) | 7 | 9  | 2 | 350 | 450 | 100 | 22 |
| 13<br>(Month 3)<br>(Day 2) | 7 | 13 | 6 | 350 | 650 | 300 | 46 |
| 13<br>(Month 4)<br>(Day 1) | 7 | 15 | 8 | 350 | 750 | 400 | 53 |
| 13<br>(Month 4)<br>(Day 2) | 7 | 10 | 3 | 350 | 500 | 150 | 30 |
| 13<br>(Month 5)<br>(Day 1) | 7 | 10 | 3 | 350 | 500 | 150 | 30 |
| 13<br>(Month 5)<br>(Day 2) | 7 | 10 | 3 | 350 | 500 | 150 | 30 |
| 13<br>(Month 6)<br>(Day 1) | 7 | 13 | 6 | 350 | 650 | 300 | 46 |
| 13<br>(Month 6)            | 7 | 9  | 2 | 350 | 450 | 100 | 22 |

|                            |   |    |   |     |     |     |    |
|----------------------------|---|----|---|-----|-----|-----|----|
| (Day 2)                    |   |    |   |     |     |     |    |
| 14<br>(Month 1)<br>(Day 1) | 6 | 10 | 4 | 300 | 500 | 200 | 40 |
| 14<br>(Month 1)<br>(Day 2) | 6 | 9  | 3 | 300 | 450 | 150 | 33 |
| 14<br>(Month 1)<br>(Day 3) | 6 | 12 | 6 | 300 | 600 | 300 | 50 |
| 14<br>(Month 2)<br>(Day 1) | 6 | 9  | 3 | 300 | 450 | 150 | 33 |
| 14<br>(Month 2)<br>(Day 2) | 6 | 9  | 3 | 300 | 450 | 150 | 33 |
| 14<br>(Month 2)<br>(Day 3) | 6 | 7  | 1 | 300 | 350 | 50  | 14 |
| 14<br>(Month 3)<br>(Day 1) | 6 | 10 | 4 | 300 | 500 | 200 | 40 |
| 14<br>(Month 3)<br>(Day 2) | 6 | 10 | 4 | 300 | 500 | 200 | 40 |
| 14<br>(Month 3)<br>(Day 2) | 6 | 7  | 1 | 300 | 350 | 50  | 14 |
| 14<br>(Month 4)<br>(Day 1) | 6 | 9  | 3 | 300 | 450 | 150 | 33 |
| 14<br>(Month 4)<br>(Day 2) | 6 | 8  | 2 | 300 | 400 | 100 | 25 |
| 14<br>(Month 4)<br>(Day 3) | 6 | 8  | 2 | 300 | 550 | 250 | 25 |
| 14<br>(Month 5)<br>(Day 1) | 6 | 7  | 1 | 300 | 400 | 100 | 14 |
| 14<br>(Month 5)<br>(Day 2) | 6 | 9  | 3 | 300 | 350 | 50  | 33 |
| 14<br>(Month 5)<br>(Day 3) | 6 | 9  | 3 | 300 | 450 | 150 | 33 |
| 14<br>(Month 6)<br>(Day 1) | 6 | 10 | 4 | 300 | 450 | 150 | 40 |
| 14<br>(Month 6)<br>(Day 2) | 6 | 12 | 6 | 300 | 500 | 200 | 50 |

|                            |   |    |   |     |     |     |    |
|----------------------------|---|----|---|-----|-----|-----|----|
| 14<br>(Month 6)<br>(Day 3) | 6 | 12 | 6 | 300 | 600 | 300 | 50 |
| 15<br>(Month 1)<br>(Day 1) | 4 | 5  | 1 | 200 | 250 | 50  | 20 |
| 15<br>(Month 1)<br>(Day 2) | 4 | 6  | 2 | 200 | 300 | 100 | 33 |
| 15<br>(Month 1)<br>(Day 3) | 4 | 6  | 2 | 200 | 300 | 100 | 33 |
| 15<br>(Month 2)<br>(Day 1) | 4 | 5  | 1 | 200 | 250 | 50  | 20 |
| 15<br>(Month 2)<br>(Day 2) | 4 | 9  | 5 | 200 | 450 | 250 | 56 |
| 15<br>(Month 2)<br>(Day 3) | 4 | 6  | 2 | 200 | 300 | 100 | 33 |
| 15<br>(Month 1)<br>(Day 1) | 4 | 9  | 5 | 200 | 450 | 250 | 56 |
| 15<br>(Month 2)<br>(Day 2) | 4 | 9  | 5 | 200 | 450 | 250 | 56 |
| 15<br>(Month 3)<br>(Day 3) | 4 | 10 | 6 | 200 | 500 | 300 | 60 |
| 15<br>(Month 4)<br>(Day 1) | 4 | 10 | 6 | 200 | 500 | 300 | 60 |
| 15<br>(Month 4)<br>(Day 2) | 4 | 5  | 1 | 200 | 250 | 50  | 20 |
| 15<br>(Month 4)<br>(Day 3) | 4 | 6  | 2 | 200 | 300 | 100 | 33 |
| 15<br>(Month 5)<br>(Day 1) | 4 | 5  | 1 | 200 | 250 | 50  | 20 |
| 15<br>(Month 5)<br>(Day 2) | 4 | 6  | 2 | 200 | 300 | 100 | 33 |
| 15<br>(Month 5)<br>(Day 3) | 4 | 7  | 3 | 200 | 350 | 150 | 43 |
| 15<br>(Month 6)<br>(Day 1) | 4 | 5  | 1 | 200 | 250 | 50  | 20 |
| 15                         | 4 | 6  | 2 | 200 | 300 | 100 | 33 |

|                            |   |    |    |     |     |     |    |
|----------------------------|---|----|----|-----|-----|-----|----|
| 16<br>(Month 6)<br>(Day 2) |   |    |    |     |     |     |    |
| 15<br>(Month 6)<br>(Day 3) | 4 | 7  | 3  | 200 | 350 | 150 | 43 |
| 16<br>(Month 1)<br>(Day 1) | 6 | 12 | 6  | 300 | 600 | 300 | 50 |
| 16<br>(Month 1)<br>(Day 2) | 6 | 11 | 5  | 300 | 550 | 250 | 45 |
| 16<br>(Month 1)<br>(Day 3) | 6 | 15 | 9  | 300 | 750 | 450 | 60 |
| 16<br>(Month 2)<br>(Day 1) | 6 | 13 | 7  | 300 | 650 | 350 | 54 |
| 16<br>(Month 2)<br>(Day 2) | 6 | 13 | 7  | 300 | 650 | 350 | 54 |
| 16<br>(Month 2)<br>(Day 3) | 6 | 10 | 4  | 300 | 500 | 200 | 40 |
| 16<br>(Month 3)<br>(Day 1) | 6 | 13 | 7  | 300 | 650 | 350 | 54 |
| 16<br>(Month 3)<br>(Day 2) | 6 | 12 | 6  | 300 | 600 | 300 | 50 |
| 16<br>(Month 3)<br>(Day 3) | 6 | 14 | 8  | 300 | 700 | 400 | 57 |
| 16<br>(Month 4)<br>(Day 1) | 6 | 11 | 5  | 300 | 550 | 250 | 45 |
| 16<br>(Month 4)<br>(Day 2) | 6 | 12 | 6  | 300 | 600 | 300 | 50 |
| 16<br>(Month 4)<br>(Day 3) | 6 | 12 | 6  | 300 | 600 | 300 | 50 |
| 16<br>(Month 5)<br>(Day 1) | 6 | 14 | 8  | 300 | 700 | 400 | 57 |
| 16<br>(Month 5)<br>(Day 2) | 6 | 14 | 8  | 300 | 700 | 400 | 57 |
| 16<br>(Month 5)<br>(Day 3) | 6 | 17 | 11 | 300 | 850 | 550 | 65 |
| 16<br>(Month 6)            | 6 | 12 | 6  | 300 | 600 | 300 | 50 |

|                          |   |    |   |     |     |     |    |
|--------------------------|---|----|---|-----|-----|-----|----|
| (Day 1)                  |   |    |   |     |     |     |    |
| 16<br>(Month 6<br>Day 2) | 6 | 15 | 9 | 300 | 550 | 250 | 60 |
| 16<br>(Month 6<br>Day 3) | 6 | 15 | 9 | 300 | 750 | 450 | 60 |
